# Supplementary material for: In vitro drug testing using patient-derived ovarian cancer organoids
Source: PubMed Central journal article supplement (PMC11445862; doi:10.1186/s13048-024-01520-2), 2024-10-02
Supplement: 13048_2024_1520_MOESM1_ESM.pdf [file 13048_2024_1520_MOESM1_ESM.pdf]

Figure S1

**A**

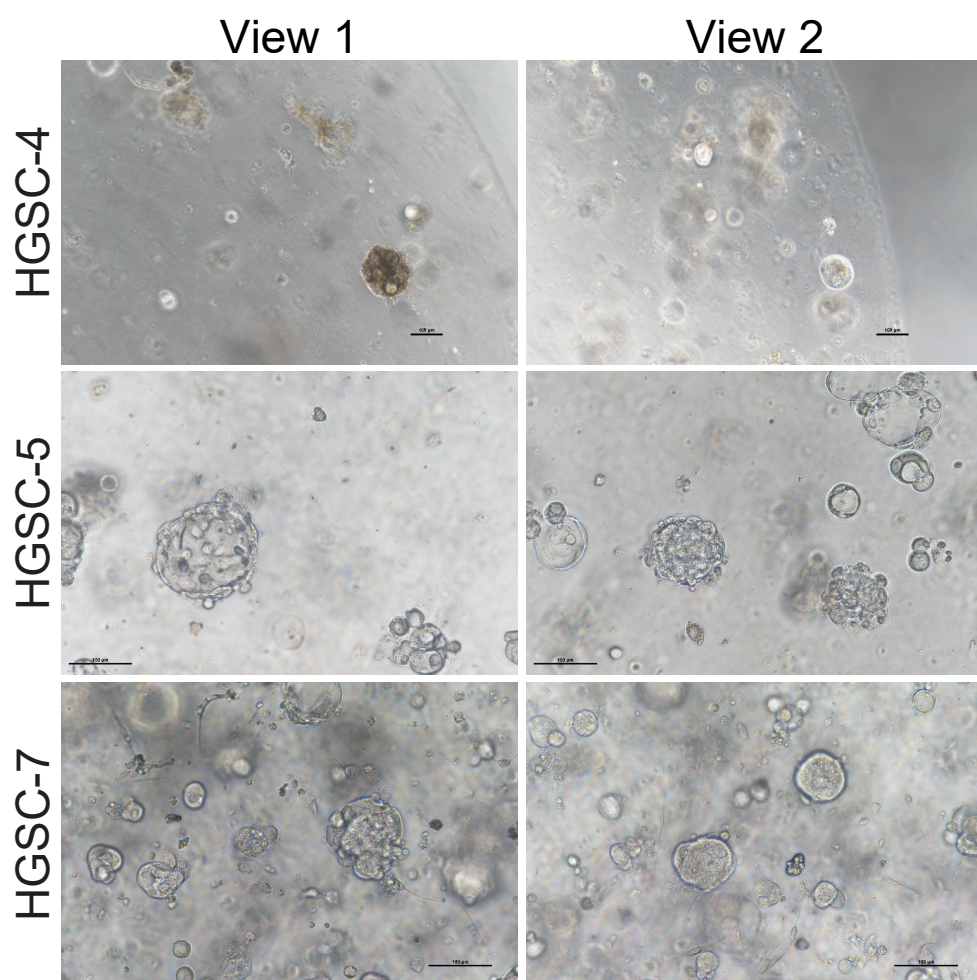

**B**

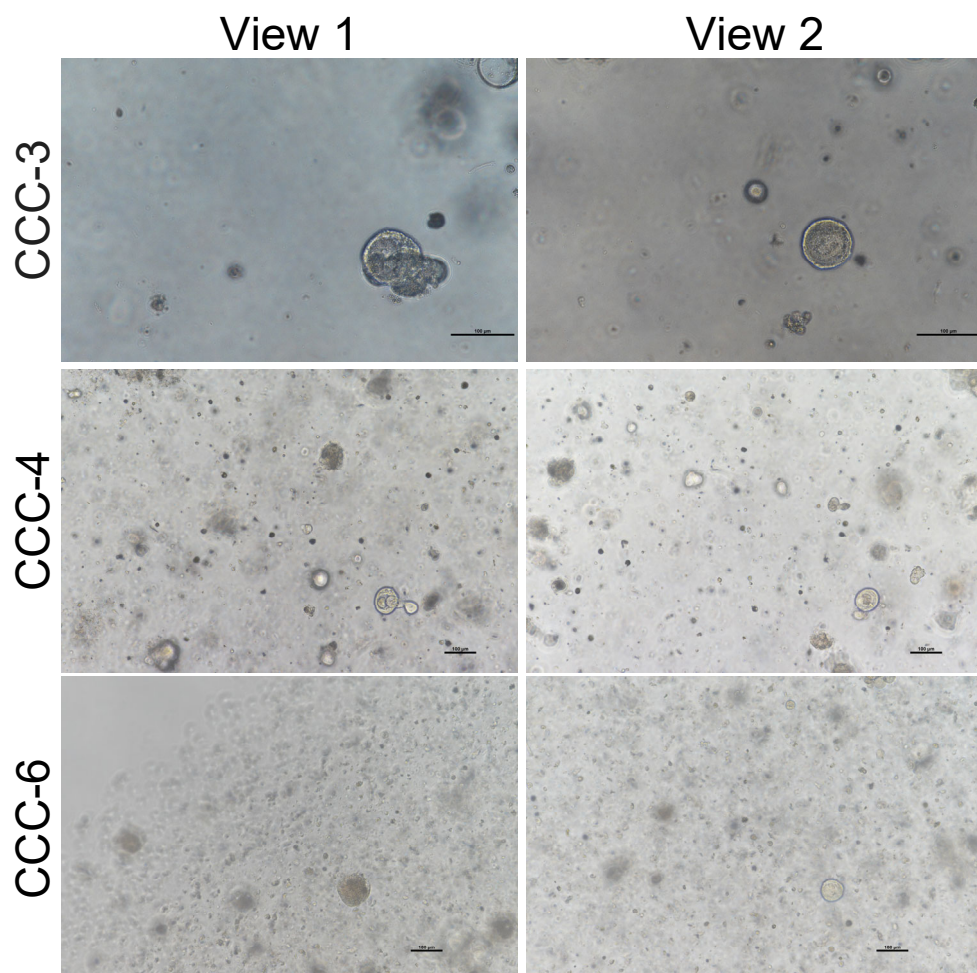

Figure S2

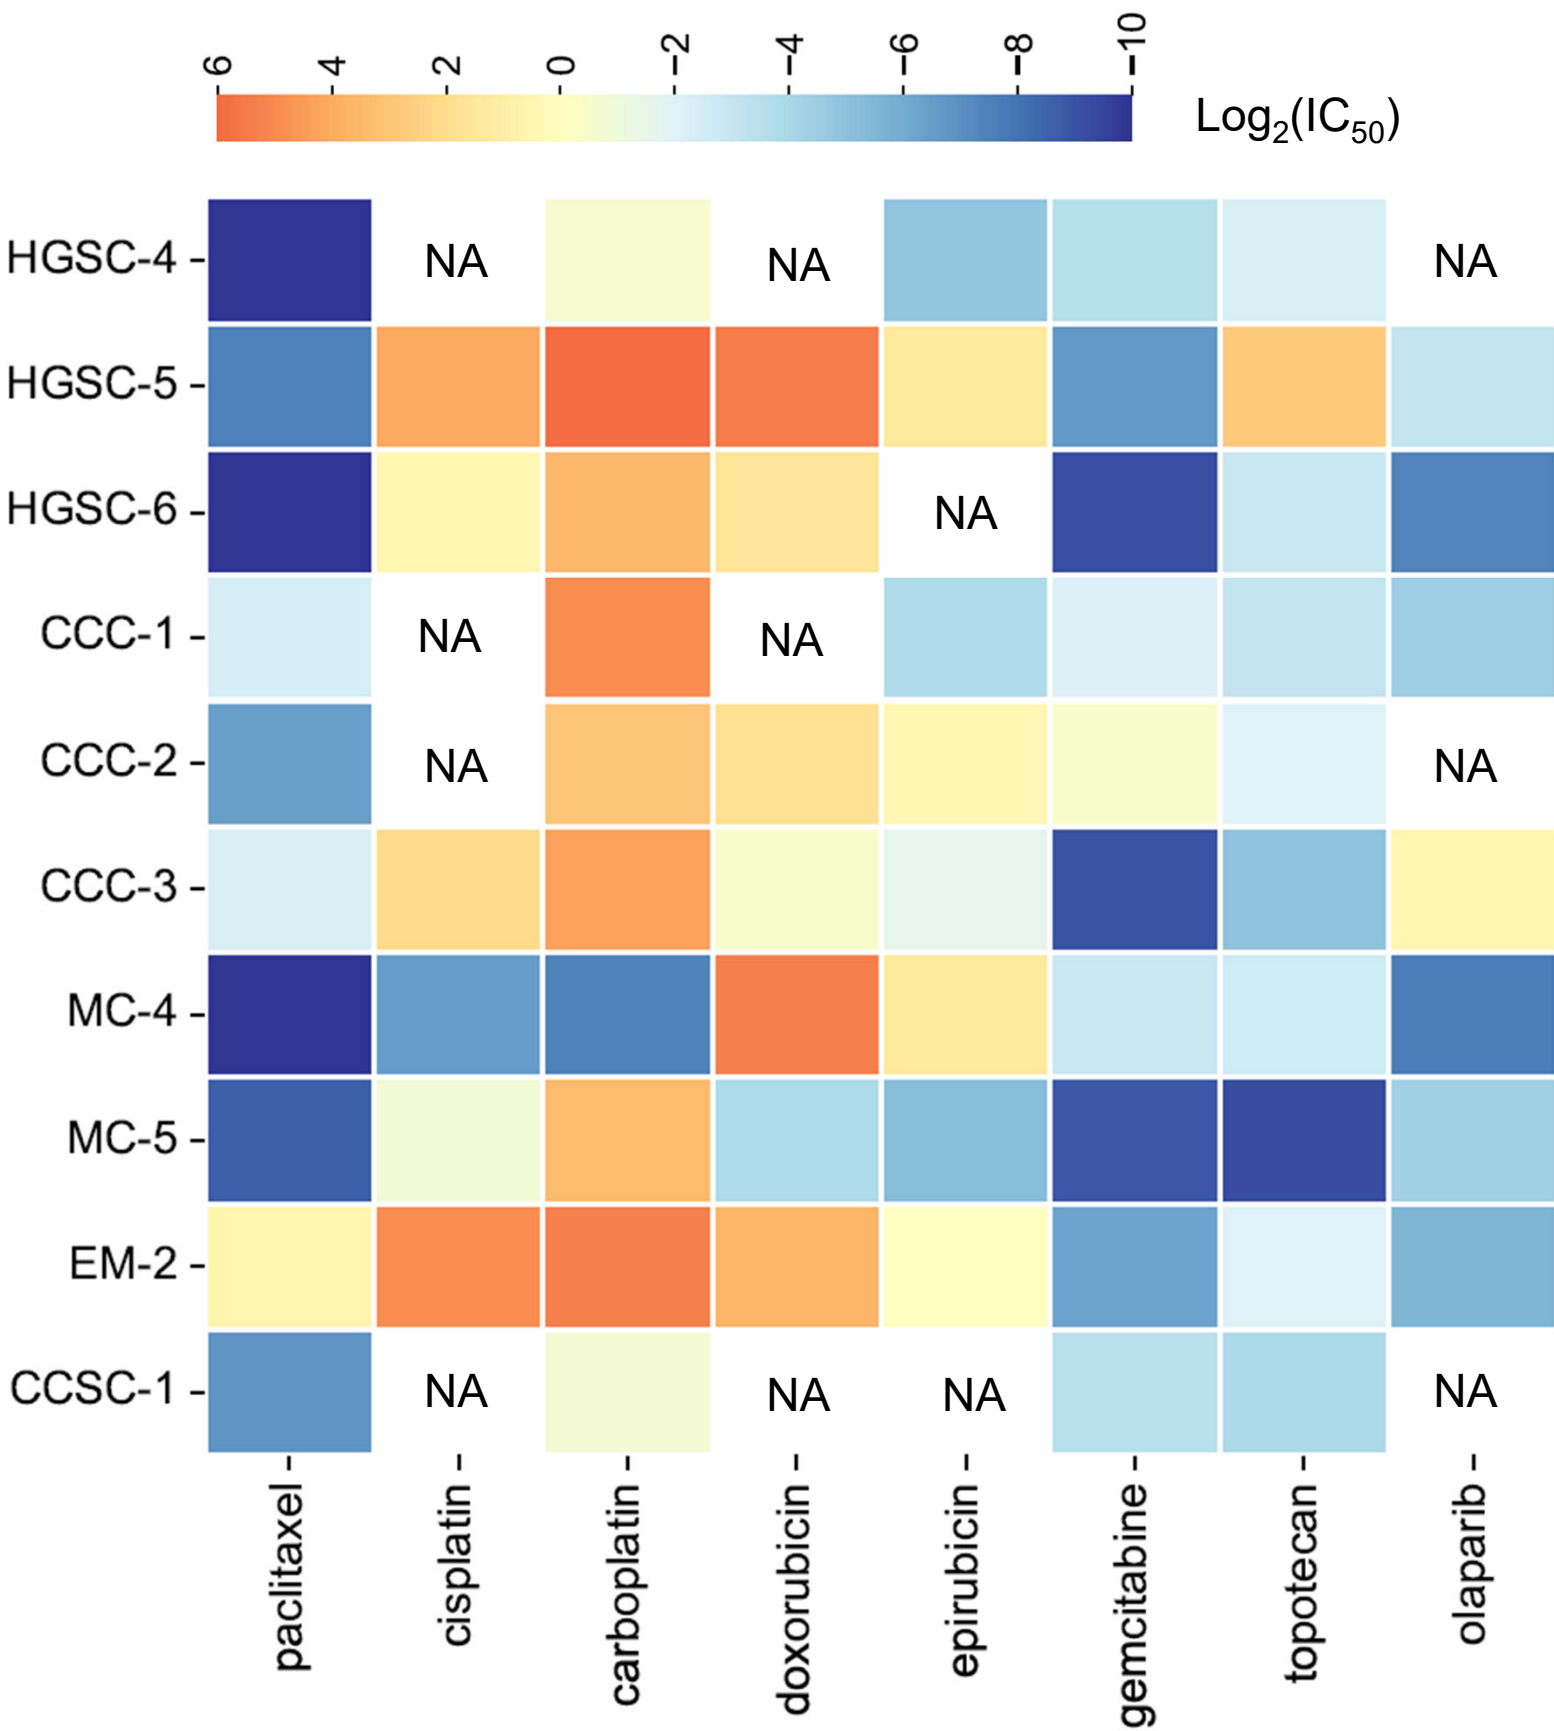

### **Supplementary Figure legends**

**Figure S1. OV-PDOs exhibit inpatient heterogeneity.**

Phase-contrast imaging of three HGSC PDOs (A) and three CCC PDOs (B) revealed distinct morphologies among organoids from the same patient, indicating inpatient heterogeneity.

**Figure S2. Visualization of drug IC<sub>50</sub> values in ovarian cancer.**

Heat map display of estimated IC<sub>50</sub> values, which represent the drug concentration required to inhibit 50% of the target response. Color intensity indicates IC<sub>50</sub> values for different drugs.
